# Supplementary material for: Reports of the economic cost of global forest protection have been greatly exaggerated
Source: Research Square preprint supplement (doi:10.21203/rs.3.rs-7926525/v1), 2025-10-30
Supplement: Supplementary file 1 [file 065ff5acb15277178f4df0dd.docx]

Table S5. Effects of a higher price elasticity on Net Output Values (billion 2018 US $, cumulative, 2025-2060) in world regions in 30x30 scenarios relative to reference scenario. Top rows: NOVs with mean cost; bottom rows: NOVs with 5% and 10% higher and lower costs than mean harvest costs.

|  | **Change relative to REF (Cumulative billion 2018 US $)** | | | **% Change relative to REF** | | |  | **Change relative to REF (Cumulative billion 2018 US $)** | | | **% Change relative to REF** | | |
| --- | --- | --- | --- | --- | --- | --- | --- | --- | --- | --- | --- | --- | --- |
| **Base cost** | **BID** | **HPR** | **CRJ** | **BID** | **HPR** | **CRJ** |  | **BID** | **HPR** | **CRJ** | **BID** | **HPR** | **CRJ** |
| AFRICA | 70.54 | 24.88 | 16.83 | 4.5% | 1.6% | 1.1% |  |  |  |  |  |  |  |
| N/C AMERICA | 231.91 | 90.45 | 100.14 | 9.3% | 3.6% | 4.0% |  |  |  |  |  |  |  |
| S AMERICA | 55.65 | 20.90 | 26.49 | 4.5% | 1.7% | 2.1% |  |  |  |  |  |  |  |
| ASIA | -52.23 | -81.71 | -137.44 | -1.1% | -1.7% | -2.8% |  |  |  |  |  |  |  |
| OCEANIA | -20.93 | 13.66 | 10.08 | -10.0% | 6.5% | 4.8% |  |  |  |  |  |  |  |
| EUROPE | 217.62 | 65.50 | 85.81 | 10.5% | 3.2% | 4.2% |  |  |  |  |  |  |  |
| WORLD | 502.56 | 133.67 | 101.92 | 4.0% | 1.1% | 0.8% |  |  |  |  |  |  |  |
|  | **Effects of higher harvest cost** | | | | | |  | **Effects of lower harvest cost** | | | | | |
| **5% higher cost** | **BID** | **HPR** | **CRJ** | **BID** | **HPR** | **CRJ** | **5% lower cost** | **BID** | **HPR** | **CRJ** | **BID** | **HPR** | **CRJ** |
| AFRICA | 45.53 | -0.81 | -8.85 | 2.9% | -0.1% | -0.6% | AFRICA | 95.55 | 50.56 | 42.52 | 6.2% | 3.3% | 2.7% |
| N/C AMERICA | 197.66 | 56.81 | 66.25 | 7.9% | 2.3% | 2.6% | N/C AMERICA | 266.17 | 124.10 | 134.03 | 10.6% | 5.0% | 5.4% |
| S AMERICA | 47.64 | 12.85 | 18.38 | 3.9% | 1.0% | 1.5% | S AMERICA | 63.66 | 28.95 | 34.61 | 5.2% | 2.3% | 2.8% |
| ASIA | -89.48 | -119.97 | -175.51 | -1.8% | -2.4% | -3.6% | ASIA | -14.98 | -43.44 | -99.37 | -0.3% | -0.9% | -2.0% |
| OCEANIA | -24.87 | 8.96 | 5.42 | -11.8% | 4.3% | 2.6% | OCEANIA | -16.99 | 18.35 | 14.75 | -8.1% | 8.7% | 7.0% |
| EUROPE | 141.12 | -8.95 | 10.03 | 6.8% | -0.4% | 0.5% | EUROPE | 294.11 | 139.95 | 161.59 | 14.2% | 6.8% | 7.8% |
| WORLD | 317.60 | -51.12 | -84.29 | 2.5% | -0.4% | -0.7% | WORLD | 687.52 | 318.47 | 288.13 | 5.5% | 2.6% | 2.3% |
| **10% higher cost** | **BID** | **HPR** | **CRJ** | **BID** | **HPR** | **CRJ** | **10% lower cost** | **BID** | **HPR** | **CRJ** | **BID** | **HPR** | **CRJ** |
| AFRICA | 20.52 | -26.50 | -34.54 | 1.3% | -1.7% | -2.2% | AFRICA | 120.56 | 76.25 | 68.21 | 7.8% | 4.9% | 4.4% |
| N/C AMERICA | 163.41 | 23.17 | 32.36 | 6.5% | 0.9% | 1.3% | N/C AMERICA | 300.42 | 157.74 | 167.92 | 12.0% | 6.3% | 6.7% |
| S AMERICA | 39.64 | 4.80 | 10.27 | 3.2% | 0.4% | 0.8% | S AMERICA | 71.66 | 37.00 | 42.72 | 5.8% | 3.0% | 3.5% |
| ASIA | -126.74 | -158.24 | -213.58 | -2.6% | -3.2% | -4.4% | ASIA | 22.28 | -5.17 | -61.30 | 0.5% | -0.1% | -1.2% |
| OCEANIA | -28.82 | 4.26 | 0.75 | -13.7% | 2.0% | 0.4% | OCEANIA | -13.05 | 23.05 | 19.41 | -6.2% | 11.0% | 9.2% |
| EUROPE | 64.63 | -83.41 | -65.75 | 3.1% | -4.0% | -3.2% | EUROPE | 370.61 | 214.40 | 237.37 | 17.9% | 10.4% | 11.5% |
| WORLD | 132.64 | -235.92 | -270.50 | 1.1% | -1.9% | -2.2% | WORLD | 872.48 | 503.27 | 474.34 | 7.0% | 4.0% | 3.8% |
