# Supplementary material for: Reports of the economic cost of global forest protection have been greatly exaggerated
Source: Research Square preprint supplement (doi:10.21203/rs.3.rs-7926525/v1), 2025-10-30
Supplement: Supplementary file 2 [file 2ca788b035c9062d5fe20057.docx]

Table S7. Effects of a lower price elasticity of supply and higher and lower harvest costs on estimated Net Output Values (NOV) in major world regions in 30x30 scenarios relative to reference scenario. Top rows: NOVs with mean cost; bottom rows: NOVs with 5% and 10% higher and lower costs.

|  | **Change relative to REF (Cumulative billion 2018 US $)** | | | **% Change relative to REF** | | |  | **Change relative to REF (Cumulative billion 2018 US $)** | | | **% Change relative to REF** | | |
| --- | --- | --- | --- | --- | --- | --- | --- | --- | --- | --- | --- | --- | --- |
| **Base cost** | **BID** | **HPR** | **CRJ** | **BID** | **HPR** | **CRJ** |  | **BID** | **HPR** | **CRJ** | **BID** | **HPR** | **CRJ** |
| AFRICA | 135.51 | 61.83 | 51.58 | 8.7% | 4.0% | 3.3% |  |  |  |  |  |  |  |
| N/C AMERICA | 323.97 | 153.82 | 155.50 | 13.0% | 6.2% | 6.2% |  |  |  |  |  |  |  |
| S AMERICA | 83.31 | 37.21 | 41.19 | 6.7% | 3.0% | 3.3% |  |  |  |  |  |  |  |
| ASIA | 73.88 | 17.86 | -53.77 | 1.5% | 0.4% | -1.1% |  |  |  |  |  |  |  |
| OCEANIA | -13.39 | 20.57 | 15.91 | -6.4% | 9.8% | 7.6% |  |  |  |  |  |  |  |
| EUROPE | 298.52 | 118.80 | 128.05 | 14.5% | 5.8% | 6.2% |  |  |  |  |  |  |  |
| WORLD | 901.80 | 410.09 | 338.46 | 7.2% | 3.3% | 2.7% |  |  |  |  |  |  |  |
|  | **Effects of higher harvest cost** | | | | | |  | **Effects of lower harvest cost** | | | | | |
| **5% higher cost** | **BID** | **HPR** | **CRJ** | **BID** | **HPR** | **CRJ** | **5% higher cost** | **BID** | **HPR** | **CRJ** | **BID** | **HPR** | **CRJ** |
| AFRICA | 110.58 | 36.28 | 26.02 | 7.1% | 2.3% | 1.7% | AFRICA | 160.44 | 87.39 | 77.14 | 10.3% | 5.6% | 5.0% |
| N/C AMERICA | 290.03 | 120.50 | 121.94 | 11.6% | 4.8% | 4.9% | N/C AMERICA | 357.92 | 187.13 | 189.05 | 14.3% | 7.5% | 7.6% |
| S AMERICA | 75.41 | 29.27 | 33.18 | 6.1% | 2.4% | 2.7% | S AMERICA | 91.21 | 45.15 | 49.20 | 7.4% | 3.7% | 4.0% |
| ASIA | 36.93 | -20.21 | -91.63 | 0.8% | -0.4% | -1.9% | ASIA | 110.84 | 55.94 | -15.91 | 2.3% | 1.1% | -0.3% |
| OCEANIA | -17.30 | 15.92 | 11.30 | -8.2% | 7.6% | 5.4% | OCEANIA | -9.48 | 25.22 | 20.53 | -4.5% | 12.0% | 9.8% |
| EUROPE | 223.32 | 45.69 | 53.73 | 10.8% | 2.2% | 2.6% | EUROPE | 373.71 | 191.92 | 202.38 | 18.1% | 9.3% | 9.8% |
| WORLD | 718.97 | 227.44 | 154.54 | 5.8% | 1.8% | 1.2% | WORLD | 1,084.63 | 592.75 | 522.38 | 8.7% | 4.8% | 4.2% |
| **10% higher cost** | **BID** | **HPR** | **CRJ** | **BID** | **HPR** | **CRJ** | **10% higher cost** | **BID** | **HPR** | **CRJ** | **BID** | **HPR** | **CRJ** |
| AFRICA | 85.65 | 10.73 | 0.46 | 5.5% | 0.7% | 0.0% | AFRICA | 185.37 | 112.94 | 102.71 | 11.9% | 7.3% | 6.6% |
| N/C AMERICA | 256.08 | 87.19 | 88.39 | 10.2% | 3.5% | 3.5% | N/C AMERICA | 391.87 | 220.45 | 222.60 | 15.7% | 8.8% | 8.9% |
| S AMERICA | 67.52 | 21.33 | 25.17 | 5.5% | 1.7% | 2.0% | S AMERICA | 99.10 | 53.09 | 57.21 | 8.0% | 4.3% | 4.6% |
| ASIA | -0.03 | -58.29 | -129.49 | 0.0% | -1.2% | -2.6% | ASIA | 147.79 | 94.02 | 21.95 | 3.0% | 1.9% | 0.4% |
| OCEANIA | -21.21 | 11.26 | 6.68 | -10.1% | 5.4% | 3.2% | OCEANIA | -5.58 | 29.87 | 25.14 | -2.7% | 14.2% | 12.0% |
| EUROPE | 148.13 | -27.43 | -20.60 | 7.2% | -1.3% | -1.0% | EUROPE | 448.91 | 265.04 | 276.70 | 21.7% | 12.8% | 13.4% |
| WORLD | 536.14 | 44.79 | -29.39 | 4.3% | 0.4% | -0.2% | WORLD | 1,267.46 | 775.40 | 706.30 | 10.2% | 6.2% | 5.7% |
