# Supplementary material for: Reports of the economic cost of global forest protection have been greatly exaggerated
Source: Research Square preprint supplement (doi:10.21203/rs.3.rs-7926525/v1), 2025-10-30
Supplement: Supplementary file 3 [file ccf4aa989c0a1099bab5f43f.docx]

**Supplementary Information**

**Reports of the economic cost of global forest protection have been greatly exaggerated**

**The Global Forest Products Model**

The Global Forest Products Model (GFPM) is a partial market equilibrium model of the global forest sector1,2. As a policy tool, GFPM has been widely applied to evaluate a range of questions relevant to worldwide, regional, and country level forest sectors1,3–6. A detailed description of the model’s structure and its mathematical formulations are found in several publications (e.g.,1,2,7). Here, we briefly describe this model and our approach in modeling the effects of forest area changes on global forests and the forest products sector.

GFPM models markets for 14 categories of forest products (Figure S1) in 180 countries and territories including 50 in Africa, 47 in Asia, 37 in Europe, 22 in North America, 13 in South America and 11 in Oceania. The 14 products represented in the model include five raw materials (industrial roundwood, roundwood, fuelwood, recovered paper, and other fiber pulp), two intermediate products (mechanical and chemical pulp), and nine end products (sawnwood, plywood, particleboard, fiberboard, newsprint, printing & writing paper, other paper, fuelwood, and other industrial roundwood). For each year, the production, consumption, trade, and prices of roundwood and finished wood products are endogenously determined in GFPM by modeling demand for end products and supply of roundwood feedstock1,2. In each year of a projection, the demands for end products are functions of exogenously projected GDP per capita and their endogenously projected prices. The forest stock of a country evolves as last year’s forest stock plus the current year’s growth minus the current year’s harvest. The supply of roundwood is then specified as a function of the forest stocks in available forests and their endogenously projected prices. Forest stock growth (net of mortality) before harvest is modeled as a negative nonlinear function of forest stock density (i.e., forest stock per unit of forest area)8, i.e., the rate of forest stock growth increases with declining stock density and decreases with increasing stock density. Consumption of raw materials (e.g., industrial roundwood) is derived from the demand for end products through the input–output coefficients (ratio of the quantity of industrial roundwood input used in manufacturing a product to the quantity of that product) and manufacturing costs (labor, capital, energy). Differences in input costs, input–output efficiency, manufacturing costs, transportation costs, and profits determine the comparative advantages of countries in producing and shipping a product1,2. For this analysis, we used the 2021 version of the GFPM, the latest version available at the time of analysis, which had a base year of 2017. Model projections were generated at five-year intervals, beginning in 2020 and extending through 2060.

GFPM is designed primarily as a policy analysis tool, facilitating an understanding of how forest products production, consumption, imports, exports, prices, and welfare are likely to change under a given or a combination of scenarios of economic changes (e.g., changes GDP), biophysical changes (e.g., changes in forest area, growth and inventory), changes in technology (e.g., changes in production capacity), and changes in trade and related policies (e.g., tariff and non-tariff related trade barriers)4,7. Such a capability in GFPM is enabled through the integration of the classical four major components of forest sector models, including (i) timber supply (production of raw materials), (ii) processing industries (manufacturing of materials into products), (iii) demand for end products, and (iv) international trade. The market equilibrium quantities of production, consumption, trade and prices solved by the model for given year and a country is obtained by maximizing the quasi-net welfare of the world forest sector: the value of the products to consumers, minus their cost of production and transport9,10, as shown in objective function in eq. 1.

[1]

where: *i* and *j* refer to countries and *k* refers to a product. *P* is price in U.S. dollars of constant value, *D* is final product demand, *S* is raw material supply, *Y* is quantity manufactured, *m* is cost of manufacture (labor, capital, and materials excluding wood and fiber), *T* is quantity transported, and *c* is freight cost (cost of transport plus tariff).

Thus, the GFPM is built on the general principle that the allocation of scarce resources in the short run is optimized by global markets, while the long run resource allocation is partly determined by the combination of market forces (e.g., projected prices) and policy changes affecting the forest sector. Policy changes may include laws or government programs affecting wood supply, regulations or incentives directed towards wastepaper recovery (i.e., the paper recycling rate), or alterations in tariff and non-tariff barriers that affect international trade.

**Protected forest area scenarios**

To represent possible implementations of 30x30 and calculate their impact, we took three scenarios for the land that might be protected to achieve a global 30% target, and one reference scenario where there was no protection added beyond the current protected-area coverage. The scenarios were taken from The Waldron Report3 but with a change of nomenclature: we used the scenarios REF, HPR, BPC and SSE from the Waldron Report but here, they are instead referred to as REF, HPR, CRJ and BID (in the same order).

The three scenarios envisage different levels of trade-off between economic and biodiversity priorities. The first, biodiversity-focused 30x30 scenario (“BID”), applies an integer linear programming (ILP) process that allocates new land for protection by maximizing biological conservation (i.e., the number of species that would become Least Concern on the IUCN rankings of extinction risks), without regard for economic consequences. The second, production-focused scenario (“HPR”, for Harsh Political Reality) starts by removing from possible protection the natural land that an integrated assessment model (AIM) projects will be needed for future agricultural production (up to 2050), then seeks to maximize biodiversity outcomes on the remaining natural lands via the same ILP process. The third, biodiversity/production compromise scenario (“CRJ” or Crown Jewels), represents a compromise between the first two 30x30 scenarios. It applies the BID ILP methods to expand protected areas from their current extent (about 17%, www. protectedplanet.net) up to 20%, without regard for economic consequences. The remaining 10% needed to achieve 30% coverage is then derived from all remaining land using the ILP process, except that in that remaining land, any areas needed for future agricultural production are masked out before the ILP process is run. The reference scenario (REF) used the November 2020 protected area spatial layer from the World Database on Protected Areas ([www.protectedplanet.net](http://www.protectedplanet.net)), kindly cleaned by the World Conservation Monitoring Centre for A.W. Half the expansion in protected area needed for 30x30 was modelled as being implemented in 2025, with the remaining half then implemented by linear interpolation up to 2030.

**Scenario input into GFPM**

For each scenario, we estimated the amount of forest that remained outside of the 30% protected area (the “harvestable forest area”) in 2025-2030 (Supplementary Table S9), using the combined forest classes from the most recent year available (2015) of the high-resolution Global Land Cover (GLC) land use classification11. Note that this approach assumes that forest in protected areas is fully protected and is not available for harvesting activities. We acknowledge that some timber exploitation can currently occur in protected areas12 but assume, for simplicity, that this becomes negligible after the implementation of 30x30.

GFPM uses and is calibrated with forest area reported by the Global Forest Resource Assessment13. Cross-checking showed that the FAO estimate of total forest area values for 2020 was different from the estimate derived using the GLC, which likely occurred because the FAO statistics are self-reported by countries whereas GLC land use classification data is satellite-based11. To align the GLC-based forest areas with the forest-area parameters taken as input by the GFPM, we used the percentage changes in GLC-based available forest area (per scenario and country) to generate a shock of the same percentage magnitude to the roundwood supply in GFPM. For a few countries, the projected percent changes in exploitable forest areas (particularly under the BID scenario) were so large that no forest stock would be available to harvest and manufacture wood products. While this would be a non-issue for modeling the scenarios for countries with little or no forest area or manufacturing activities, for seven countries in the BID scenario (only), such changes would prevent GFPM from identifying a market-clearing solution. To solve this problem, and for the BID scenario only, we adjusted downward the unavailable forest area percentage by half for those seven countries: New Zealand, South Africa, Thailand, Czechia, Chile, Liberia, and Equatorial Guinea.

The harvestable forest area, in each year from 2025 to 2030 and in each scenario, was then input into GFPM. Specifically, the exogenously applied shocks (reductions in available forest area) were translated endogenously in GFPM into proportionate changes in available forest growing stocks (quantity of standing timber, in cubic meters), which the model then translates into change in the roundwood supply. In this analysis, ‘roundwood’ includes industrial roundwood, other roundwood, and fuelwood, which combined represent the primary wood products sector.

**Estimating changes in economic output due to 30x30**

The projected changes in forest growing stock generate shifts in timber supply within the GFPM, with reductions in stocks causing backwards shift in the supply of roundwood for each country, leading to new market equilibria that characterize the forest sector outcomes of the 30x30 initiative. The model projection of the impact of each individual scenario on forestry economic outputs is initially based on the changes in the production, value and trade of roundwood, with effects on “downstream’ products from roundwood worked out subsequently. Domestic roundwood prices are represented by the world price for a net exporting country, whereas for the net importing country, domestic prices are represented by world price plus freight cost (the cost of shipping products overseas)1,2.

The economic consequences of 30x30 for the forestry sector were derived by comparing the equilibrium model solutions for the three 30x30 scenarios with the solutions for the reference scenario in terms of price, production, consumption, trade, and revenues. Background (non-market-driven) changes in forest areas after 2030 were also endogenously projected by GFPM based on an environmental Kuznets curve14, in which forest area change is negative at low GDP per capita, becomes positive and increases at higher GDP per capita, and then decreases and approaches zero at very high GDP per capita8. The main equilibrium result of interest is the gross output value (GOV), calculated for each scenario from the projected prices and quantities of roundwood production in each country (i.e. quantity * price). We projected these outcomes from 2025 to 2060 in five-year increments. Note that GDP per capita and all other economic variables remained the same in both the reference and the alternative scenarios, except for the available forest area, which allowed us to attribute the model outcomes to changes in available forests due to the three scenarios for implementation of the 30x30 initiative.

Finally, the net output value (NOV) of roundwood production was calculated by subtracting the average cost of harvesting and transporting roundwood from the projected GOV (see the ‘Forestry cost estimates’ section in the main manuscript). The effects on net revenues of downstream manufacturing products production were not calculated, because that would represent a form of double-counting, since roundwood is the input to those manufactured wood products (see15,16).

**References**

1. Nepal, P., Buongiorno, J., Johnston, C. M. T., Prestemon, J. P. & Guo, J. Global forest products trade model. in *International trade in forest products: Lumber trade disputes, models and examples* (eds van Kooten, G. C. & Voss, L.) 110–141 (CABI, 2021).

2. Buongiorno, J. Global modelling to predict timber production and prices: The GFPM approach. *Forestry: An International Journal of Forest Research* **88**, 291–303 (2015).

3. Waldron, A. *et al.* Protecting 30% of the planet for nature: costs, benefits and economic implications. 58 https://www.conservation.cam.ac.uk/files/waldron_report_30_by_30_publish.pdf (2020).

4. Buongiorno, J. & Johnston, C. Potential effects of US protectionism and trade wars on the global forest sector. *Forest Science* **64**, 121–128 (2018).

5. Johnston, C. M. T. & Radeloff, V. C. Global mitigation potential of carbon stored in harvested wood products. *Proceedings of the National Academy of Sciences of the United States of America* **116**, 4526–14531 (2019).

6. Johnston, C. M. T. & Buongiorno, J. Impact of Brexit on the forest products industry of the United Kingdom and the rest of the world. *Forestry: An International Journal of Forest Research* **90**, 47–57 (2017).

7. Buongiorno, J., Zhu, S., Zhang, D., Turner, J. & Tomberlin, D. *The Global Forest Products Model: Structure, Estimation, and Applications*. (Elsevier, 2003).

8. Turner, J. A., Buongiorno, J. & Zhu, S. An economic model of international wood supply, forest stock and forest area change. *Scandinavian Journal of Forest Research* **21**, 73–86 (2006).

9. Samuelson, P. A. Spatial price equilibrium and linear programming. *American Economic Review* **42**, 283-301. (1952).

10. Takayama, T., Hashimoto, H. & Uri, N. D. Spatial and temporal price and allocation modeling: Some extensions. *Socio-Economic Planning Sciences* **18**, 227–234 (1984).

11. Li, B. *et al.* An improved global land cover mapping in 2015 with 30 m resolution (GLC-2015) based on a multisource product-fusion approach. *Earth System Science Data* **15**, 2347–2373 (2023).

12. Jung, M. *et al.* The global exposure of species ranges and protected areas to forest management. *Diversity and Distributions* **28**, 1487–1496 (2022).

13. FAO. *Global Forest Resources Assessment 2020. Main Report.* (FAO, Rome, 2020).

14. Koop, G. & Tole, L. Is there an environmental Kuznets curve for deforestation? *Journal of Development Economics* **58**, 231–244 (1999).

15. Just, R. E. & Hueth, D. L. Welfare measures in a multimarket framework. *American Economic Review* **69**, 947–954 (1979).

16. Thurman, W. N. & Easley, J. E. Valuing changes in commercial fishery harvests: A general equilibrium derived demand analysis. *Journal of Environmental Economics and Management* **22**, 226–240 (1992).


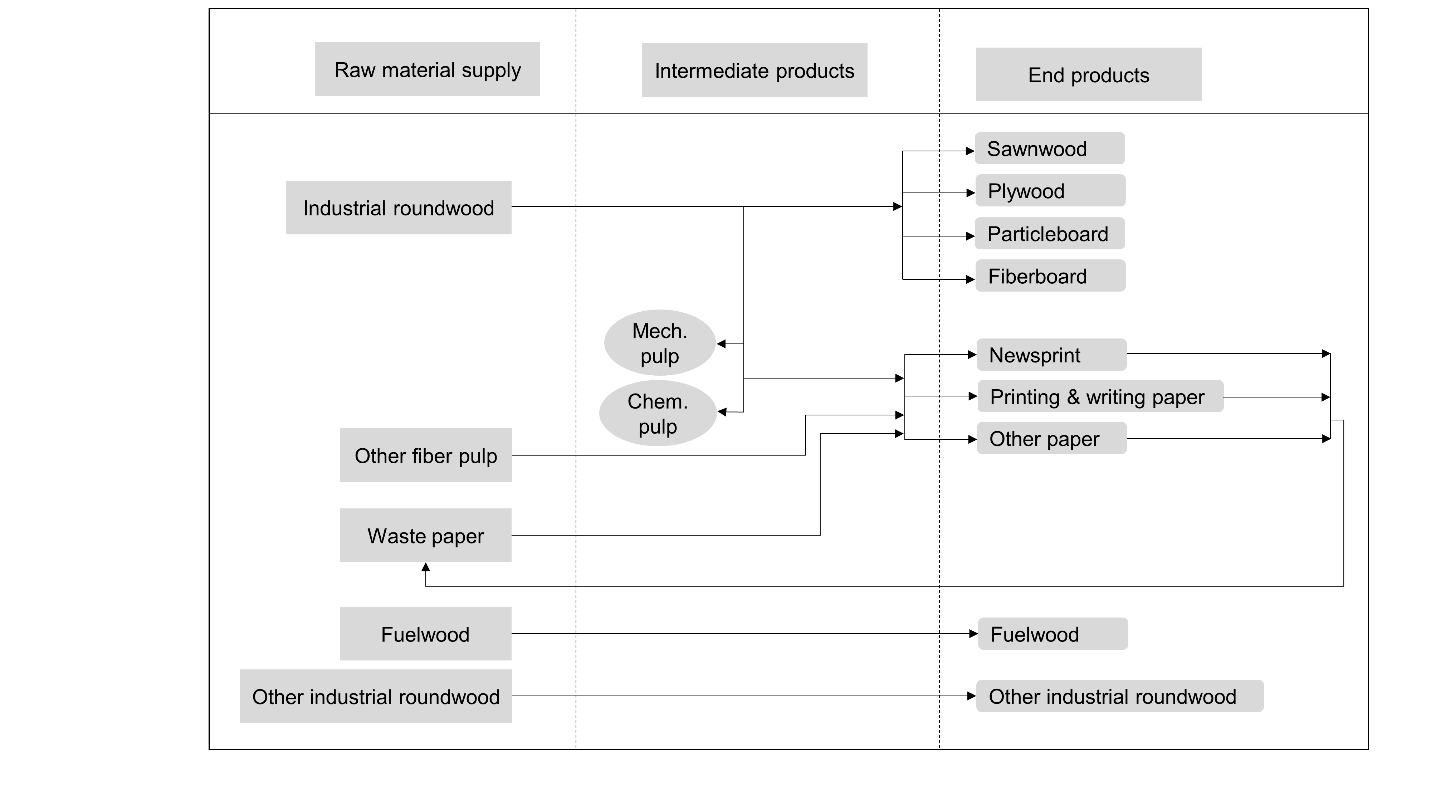
Fig. S1. Flow of raw materials, intermediate products, and end products modeled in the GFPM.

Fig. S2. Estimated mean real cost of harvesting, extracting, and delivering roundwood to mills in various regions (2018 US dollars/m3). Error bars represent one standard deviation from the data mean.

Table S1. Projected changes in Net Output Values (NOVs) in 30x30 scenarios relative to reference scenario. Value columns represent absolute changes (cumulative million 2018 US $, 2025-2060) compared to REF, and % columns represent % change in cumulative NOVs compared to REF).

| **Region/Country** | **BID** | | **HPR** | | **CRJ** | |
| --- | --- | --- | --- | --- | --- | --- |
| **Value** | **%** | **Value** | **%** | **Value** | **%** |
| **AFRICA** | **98,552** | **6.4%** | **41,233** | **2.7%** | **31,371** | **2.0%** |
| Algeria | 605 | 3.5% | 423 | 2.4% | 398 | 2.3% |
| Angola | 1,419 | 10.9% | 311 | 2.4% | 453 | 3.5% |
| Benin | 1,574 | 11.4% | 481 | 3.5% | 401 | 2.9% |
| Botswana | 179 | 10.8% | 39 | 2.3% | 46 | 2.8% |
| Burkina Faso | 3,466 | 9.1% | 1,102 | 2.9% | 909 | 2.4% |
| Burundi | 1,275 | 10.0% | 403 | 3.2% | 331 | 2.6% |
| Cameroon | -763 | -2.2% | 162 | 0.5% | -1,404 | -4.0% |
| Cape Verde | 35 | 10.3% | 10 | 3.0% | 8 | 2.3% |
| Central African Republic | 821 | 12.3% | -39 | -0.6% | 213 | 3.2% |
| Chad | 1,898 | 11.1% | 424 | 2.5% | 456 | 2.7% |
| Congo, Republic of | -87 | -0.8% | 742 | 6.9% | 27 | 0.3% |
| Côte d'Ivoire | 2,215 | 8.9% | 843 | 3.4% | 673 | 2.7% |
| Djibouti | 82 | 11.3% | 22 | 3.0% | 19 | 2.7% |
| Egypt | 1,225 | 9.3% | 324 | 2.5% | 285 | 2.2% |
| Equatorial Guinea | -202 | -4.4% | 340 | 7.4% | 257 | 5.6% |
| Ethiopia | 23,023 | 10.7% | 6,599 | 3.1% | 5,704 | 2.7% |
| Gabon | -350 | -4.1% | 454 | 5.3% | 175 | 2.1% |
| Gambia | 84 | 2.8% | -18 | -0.6% | -39 | -1.3% |
| Ghana | 10,557 | 11.2% | 3,295 | 3.5% | 2,780 | 2.9% |
| Guinea | 2,769 | 11.1% | 838 | 3.3% | 705 | 2.8% |
| Guinea-Bissau | 586 | 10.1% | 191 | 3.3% | 160 | 2.8% |
| Kenya | 4,290 | 7.9% | 1,661 | 3.0% | 1,323 | 2.4% |
| Lesotho | 330 | 6.5% | -21 | -0.4% | -68 | -1.4% |
| Liberia | 1,637 | 8.9% | 431 | 2.3% | 45 | 0.2% |
| Libyan Arab Jamahiriya | -534 | -21.7% | 59 | 2.4% | 83 | 3.4% |
| Madagascar | 2,599 | 9.5% | 798 | 2.9% | 625 | 2.3% |
| Malawi | -5,311 | -31.7% | 456 | 2.7% | 267 | 1.6% |
| Mali | 1,526 | 10.5% | 385 | 2.6% | 401 | 2.7% |
| Mauritania | 468 | 11.3% | 131 | 3.2% | 114 | 2.7% |
| Mauritius | 0 | -2.4% | 0 | 2.8% | 0 | -0.6% |
| Morocco | -88 | -0.5% | 324 | 1.8% | 255 | 1.4% |
| Mozambique | 3,686 | 8.6% | 402 | 0.9% | 584 | 1.4% |
| Niger | 2,664 | 11.3% | 292 | 1.2% | 629 | 2.7% |
| Nigeria | 13,443 | 8.0% | 3,515 | 2.1% | 2,507 | 1.5% |
| Réunion | 13 | 6.6% | 6 | 3.3% | 5 | 2.8% |
| Rwanda | -6,792 | -56.5% | -321 | -2.7% | -387 | -3.2% |
| Sao Tome and Principe | 1 | 0.5% | 12 | 3.7% | 9 | 3.0% |
| Senegal | 1,152 | 8.6% | 413 | 3.1% | 306 | 2.3% |
| Sierra Leone | 1,242 | 10.7% | 378 | 3.3% | 323 | 2.8% |
| Somalia | 2,543 | 8.9% | 364 | 1.3% | 719 | 2.5% |
| South Africa | -4,609 | -5.9% | 996 | 1.3% | -1,086 | -1.4% |
| Sudan | 2,430 | 6.6% | 878 | 2.4% | 805 | 2.2% |
| Swaziland | -2,736 | -53.2% | 134 | 2.6% | 79 | 1.5% |
| Tanzania, United Rep of | 5,432 | 10.3% | 1,854 | 3.5% | 1,521 | 2.9% |
| Togo | 807 | 8.9% | 243 | 2.7% | 195 | 2.2% |
| Tunisia | 218 | 2.4% | 236 | 2.6% | 184 | 2.0% |
| Uganda | -3,005 | -3.4% | 2,946 | 3.3% | 2,466 | 2.8% |
| Congo, Dem Republic of | 19,396 | 10.9% | 5,338 | 3.0% | 4,925 | 2.8% |
| Zambia | 5,312 | 10.9% | 1,700 | 3.5% | 1,422 | 2.9% |
| Zimbabwe | 2,028 | 9.4% | 676 | 3.1% | 565 | 2.6% |
| **N/C AMERICA** | **271,972** | **10.9%** | **116,648** | **4.7%** | **120,829** | **4.8%** |
| Bahamas | 5 | 9.4% | 2 | 3.9% | 2 | 2.8% |
| Barbados | -16 | -42.6% | 2 | 5.6% | 2 | 4.3% |
| Belize | -1 | -0.2% | 16 | 4.8% | 13 | 3.8% |
| Canada | 82,899 | 11.0% | 605 | 0.1% | 32,932 | 4.4% |
| Saint Lucia | 2 | 12.4% | 1 | 3.7% | 0 | 2.2% |
| Costa Rica | 316 | 3.0% | 601 | 5.8% | 464 | 4.5% |
| Cuba | 100 | 2.3% | 233 | 5.4% | 180 | 4.2% |
| Dominica | 1 | 10.2% | 1 | 4.1% | 0 | 0.8% |
| Dominican Republic | 138 | 7.7% | 71 | 4.0% | 60 | 3.4% |
| El Salvador | -141 | -1.8% | 193 | 2.5% | 152 | 1.9% |
| Guatemala | 4,023 | 11.4% | 1,330 | 3.8% | 1,132 | 3.2% |
| Haiti | 343 | 9.6% | 109 | 3.0% | 81 | 2.3% |
| Honduras | 1,342 | 8.9% | 622 | 4.1% | 521 | 3.4% |
| Jamaica | 244 | 13.0% | 118 | 6.3% | 89 | 4.8% |
| Martinique | 2 | 12.1% | 1 | 3.3% | 0 | 1.2% |
| Mexico | 10,384 | 10.8% | 4,713 | 4.9% | 3,568 | 3.7% |
| Netherlands Antilles | 0 | -11.4% | 0 | 3.5% | 0 | -19.2% |
| Nicaragua | 792 | 7.7% | 178 | 1.7% | 129 | 1.3% |
| Panama | -244 | -9.3% | -4 | -0.1% | -50 | -1.9% |
| Saint Vincent/Grenadines | 1 | 8.6% | 1 | 3.8% | 0 | 2.1% |
| Trinidad and Tobago | -148 | -35.8% | 20 | 4.8% | 15 | 3.7% |
| United States of America | 171,926 | 11.0% | 107,837 | 6.9% | 81,539 | 5.2% |
| **S AMERICA** | **66,684** | **5.4%** | **26,905** | **2.2%** | **32,358** | **2.6%** |
| Argentina | 2,932 | 4.3% | 1,696 | 2.5% | 1,695 | 2.5% |
| Bolivia | 606 | 6.1% | 164 | 1.7% | 232 | 2.3% |
| Brazil | 49,194 | 6.2% | 11,620 | 1.5% | 19,812 | 2.5% |
| Chile | 7,362 | 3.8% | 11,005 | 5.7% | 8,883 | 4.6% |
| Colombia | 2,799 | 10.2% | 1,206 | 4.4% | 882 | 3.2% |
| Ecuador | -1,480 | -6.7% | 485 | 2.2% | 146 | 0.7% |
| French Guiana | 12 | 2.1% | 18 | 3.1% | 15 | 2.5% |
| Guyana | 428 | 11.8% | 197 | 5.4% | 155 | 4.3% |
| Paraguay | 2,098 | 7.6% | 546 | 2.0% | 566 | 2.1% |
| Peru | 1,928 | 7.0% | 652 | 2.4% | 541 | 2.0% |
| Suriname | -964 | -24.6% | -179 | -4.6% | -615 | -15.7% |
| Uruguay | 204 | 0.5% | -1,187 | -2.9% | -484 | -1.2% |
| Venezuela, Boliv Rep of | 1,564 | 8.3% | 683 | 3.6% | 532 | 2.8% |
| **ASIA** | **348** | **0.0%** | **-37,784** | **-0.8%** | **-104,009** | **-2.1%** |
| Afghanistan | -7,769 | -69.6% | -3,168 | -28.4% | -5,037 | -45.1% |
| Bahrain | 3 | 11.4% | 1 | 3.9% | 1 | 3.1% |
| Bangladesh | 5,329 | 9.7% | 1,449 | 2.6% | 1,258 | 2.3% |
| Bhutan | 1,071 | 9.6% | 323 | 2.9% | 277 | 2.5% |
| Brunei Darussalam | -9 | -3.1% | 10 | 3.4% | 8 | 2.5% |
| Cambodia | 1,317 | 6.3% | 508 | 2.4% | 480 | 2.3% |
| China | 103,502 | 4.6% | -17,115 | -0.8% | -43,616 | -1.9% |
| Cyprus | 0 | -0.6% | 3 | 6.4% | 2 | 5.0% |
| Maldives | 4 | 10.5% | 1 | 2.7% | 0 | 1.4% |
| India | -24,009 | -2.2% | 3,528 | 0.3% | 8,928 | 0.8% |
| Indonesia | -22,491 | -5.1% | 12,703 | 2.9% | -7,588 | -1.7% |
| Iran, Islamic Rep of | -712 | -5.4% | 704 | 5.4% | 374 | 2.9% |
| Iraq | -7 | -0.4% | -77 | -4.9% | -118 | -7.4% |
| Israel | -168 | -41.5% | 27 | 6.7% | 19 | 4.8% |
| Japan | -5,586 | -4.0% | 6,772 | 4.9% | 5,100 | 3.7% |
| Jordan | 77 | 10.4% | 12 | 1.7% | 9 | 1.3% |
| Korea, Dem People's Rep | 2,086 | 10.1% | -1,699 | -8.3% | 673 | 3.3% |
| Korea, Republic of | -1,951 | -7.7% | 1,812 | 7.1% | 1,335 | 5.2% |
| Kuwait | 4 | 10.3% | 1 | 2.7% | 1 | 1.5% |
| Laos | 2,880 | 11.4% | 1,255 | 5.0% | 993 | 3.9% |
| Lebanon | -196 | -49.9% | -38 | -9.6% | -45 | -11.4% |
| Timor-Leste | 19 | 10.4% | 5 | 2.8% | 4 | 2.3% |
| Malaysia | -26,149 | -35.9% | 2,781 | 3.8% | -279 | -0.4% |
| Mongolia | 206 | 10.6% | 71 | 3.6% | 64 | 3.3% |
| Myanmar | 16,930 | 17.3% | 2,364 | 2.4% | -180 | -0.2% |
| Nepal | 2,486 | 7.5% | 821 | 2.5% | 680 | 2.1% |
| Oman | 5 | 4.7% | 0 | 0.2% | -1 | -1.1% |
| Pakistan | -3,306 | -3.4% | -1,002 | -1.0% | -2,872 | -2.9% |
| Philippines | 4,118 | 8.9% | 1,874 | 4.1% | 1,402 | 3.0% |
| Qatar | 3 | 14.0% | -10 | -51.9% | 0 | 0.0% |
| Saudi Arabia | 59 | 7.9% | 13 | 1.8% | 13 | 1.8% |
| Singapore | 3 | 10.2% | 1 | 2.7% | 1 | 2.4% |
| Sri Lanka | 312 | 2.5% | 444 | 3.6% | 364 | 3.0% |
| Syrian Arab Republic | -94 | -24.8% | -21 | -5.5% | -102 | -26.8% |
| Thailand | -15,273 | -11.1% | -14,800 | -10.7% | -16,180 | -11.7% |
| Turkey | -16,553 | -11.7% | -44,567 | -31.6% | -54,830 | -38.9% |
| United Arab Emirates | 5 | 8.7% | -21 | -33.8% | -21 | -34.6% |
| Viet Nam | -17,008 | -12.3% | 7,246 | 5.2% | 4,556 | 3.3% |
| Yemen | 101 | 8.9% | 9 | 0.8% | 26 | 2.3% |
| Armenia | 239 | 7.7% | 82 | 2.6% | 71 | 2.3% |
| Azerbaijan, Republic of | 59 | 6.8% | 20 | 2.4% | 17 | 2.0% |
| Georgia | -389 | -19.7% | 75 | 3.8% | 53 | 2.7% |
| Kazakhstan | 364 | 12.9% | -235 | -8.3% | 124 | 4.4% |
| Kyrgyzstan | 94 | 8.7% | -85 | -7.8% | -85 | -7.9% |
| Tajikistan | 732 | 9.7% | 136 | 1.8% | 109 | 1.4% |
| Turkmenistan | 0 | -3.3% | 0 | -18.0% | -1 | -19.8% |
| Uzbekistan | 10 | 11.1% | 4 | 4.2% | 3 | 3.4% |
| **OCEANIA** | **-17,468** | **-8.3%** | **16,592** | **7.9%** | **12,289** | **5.8%** |
| Australia | -21,707 | -19.7% | 9,932 | 9.0% | 7,429 | 6.7% |
| Cook Islands | 0 | 9.9% | 0 | 8.0% | 0 | 1.3% |
| Fiji Islands | -319 | -13.3% | 171 | 7.1% | 117 | 4.9% |
| French Polynesia | 1 | 9.2% | 1 | 5.4% | 0 | 2.6% |
| New Caledonia | -3 | -6.1% | 3 | 6.3% | 2 | 4.9% |
| New Zealand | 1,001 | 1.6% | 4,445 | 6.9% | 3,334 | 5.2% |
| Papua New Guinea | 3,875 | 17.3% | 1,820 | 8.1% | 1,398 | 6.2% |
| Samoa | 12 | 13.3% | 5 | 5.3% | 4 | 4.4% |
| Solomon Islands | -368 | -3.6% | 194 | 1.9% | -11 | -0.1% |
| Tonga | 1 | 13.2% | 0 | 5.4% | 0 | -1.4% |
| Vanuatu | 38 | 11.7% | 21 | 6.5% | 16 | 5.0% |
| **EUROPE** | **250,827** | **12.1%** | **86,234** | **4.2%** | **99,597** | **4.8%** |
| Albania | 158 | 11.6% | 159 | 11.7% | 142 | 10.4% |
| Austria | -3,418 | -6.9% | 1,489 | 3.0% | 663 | 1.3% |
| Belgium | 265 | 5.4% | 131 | 2.7% | 109 | 2.2% |
| Bosnia and Herzegovina | 164 | 1.3% | -1,390 | -11.2% | -2,113 | -17.0% |
| Bulgaria | 2,132 | 15.2% | 1,471 | 10.5% | 1,114 | 8.0% |
| Croatia | 965 | 10.2% | 914 | 9.7% | 697 | 7.4% |
| Czechia | 3,967 | 10.3% | 2,228 | 5.8% | 1,636 | 4.2% |
| Denmark | 899 | 17.6% | 406 | 8.0% | 310 | 6.1% |
| Finland | 32,386 | 13.4% | 18,076 | 7.5% | 13,710 | 5.7% |
| France | 11,412 | 13.9% | 5,892 | 7.2% | 4,051 | 4.9% |
| Germany | 24,455 | 15.5% | 11,017 | 7.0% | 8,394 | 5.3% |
| Greece | -264 | -10.6% | 213 | 8.5% | 168 | 6.8% |
| Hungary | 1,939 | 20.5% | 967 | 10.2% | 728 | 7.7% |
| Luxembourg | 75 | 12.6% | 43 | 7.2% | 31 | 5.2% |
| Ireland | 444 | 5.2% | 58 | 0.7% | -76 | -0.9% |
| Italy | -2,241 | -8.9% | 1,872 | 7.5% | 1,485 | 5.9% |
| Montenegro | -432 | -22.6% | 168 | 8.8% | 131 | 6.9% |
| Netherlands | 154 | 7.8% | 108 | 5.5% | 92 | 4.7% |
| North Macedonia | -122 | -10.6% | 37 | 3.2% | 25 | 2.2% |
| Norway | 5,866 | 14.3% | 1,623 | 4.0% | 674 | 1.6% |
| Poland | 5,156 | 6.6% | 1,070 | 1.4% | -8 | 0.0% |
| Portugal | -8,372 | -16.8% | 1,531 | 3.1% | 743 | 1.5% |
| Romania | 7,054 | 15.5% | 3,760 | 8.3% | 2,776 | 6.1% |
| Slovakia | 1,660 | 10.7% | 896 | 5.8% | 665 | 4.3% |
| Slovenia | -497 | -6.4% | 696 | 8.9% | 527 | 6.8% |
| Spain | 458 | 1.0% | 4,470 | 9.5% | 3,233 | 6.8% |
| Sweden | 35,242 | 12.5% | 18,975 | 6.7% | 14,218 | 5.0% |
| Switzerland | 321 | 2.5% | 579 | 4.5% | 336 | 2.6% |
| United Kingdom | 3,450 | 10.9% | 1,407 | 4.4% | 805 | 2.5% |
| Serbia | 1,444 | 13.9% | 733 | 7.1% | 554 | 5.3% |
| Belarus | 11,605 | 19.9% | 5,618 | 9.7% | 4,216 | 7.2% |
| Estonia | 4,670 | 19.2% | 2,366 | 9.7% | 1,796 | 7.4% |
| Latvia | 5,510 | 17.3% | 3,056 | 9.6% | 2,289 | 7.2% |
| Lithuania | 2,915 | 19.9% | 1,452 | 9.9% | 1,102 | 7.5% |
| Moldova, Republic of | 292 | 30.9% | 76 | 8.0% | 67 | 7.1% |
| Russian Federation | 91,548 | 15.1% | -9,933 | -1.6% | 30,969 | 5.1% |
| Ukraine | 9,567 | 24.7% | 4,002 | 10.3% | 3,337 | 8.6% |
| **WORLD** | **670,916** | **5.4%** | **249,829** | **2.0%** | **192,435** | **1.5%** |

Table S2. Projected changes in world prices (%) of roundwood and manufactured wood products in 30x30 scenarios in 2030, relative to projected 2030 reference levels.

| **Country/Region** | **BID** | **HPR** | **CRJ** |
| --- | --- | --- | --- |
| **Change in 2030 from REF (%)** | | |
| Industrial roundwood | 7.2 | 3.3 | 2.6 |
| Fuelwood | 12.2 | 3.4 | 3.2 |
| Other Industrial roundwood | 10.7 | 6.5 | 5.0 |
| **Average all roundwood** | **9.6** | **4.5** | **3.7** |
| **Sawnwood** | **3.0** | **2.4** | **1.6** |
| Plywood/Veneer | 2.4 | 1.3 | 0.8 |
| Particleboard | 1.8 | 1.0 | 0.8 |
| Fiberboard | 1.8 | 1.0 | 0.8 |
| **Average wood-based panels** | **2.1** | **1.1** | **0.8** |
| Newsprint | 4.3 | 0.5 | 0.3 |
| Printing and writing paper | 0.7 | 0.4 | 0.3 |
| Other paper and paperboard | 0.5 | 0.3 | 0.2 |
| **Average all paper and paperboard** | **1.4** | **0.4** | **0.3** |

Table S3. Percent changes in cumulative consumption and production of roundwood, finished solidwood products, and paper products in 30x30 scenarios relative to reference, 2025-2060.

| **Region** | **Roundwood** | | **Finished solidwood** | | **Finished paper** | |
| --- | --- | --- | --- | --- | --- | --- |
| **Production** | **Consumption** | **Production** | **Consumption** | **Production** | **Consumption** |
| **AFRICA** |  |  |  |  |  |  |
| BID | -2.93% | -2.43% | -9.49% | -3.30% | -0.84% | -0.94% |
| HPR | -0.50% | -0.43% | -1.58% | -1.06% | -0.71% | -0.37% |
| CRJ | -0.49% | -0.33% | -1.94% | -0.91% | -0.72% | -0.26% |
| **N/C AMERICA** |  |  |  |  |  |  |
| BID | 2.93% | 2.98% | 6.03% | -1.26% | 2.80% | -0.65% |
| HPR | 1.01% | 0.96% | 2.28% | -0.75% | 0.96% | -0.32% |
| CRJ | 2.93% | 2.98% | 6.03% | -1.26% | 2.80% | -0.65% |
| **S AMERICA** |  |  |  |  |  |  |
| BID | -1.31% | -1.35% | -4.14% | -1.94% | -0.18% | -0.61% |
| HPR | -0.80% | -1.50% | -4.19% | -0.90% | -1.17% | -0.31% |
| CRJ | 0.08% | -0.42% | -0.98% | -0.64% | -0.67% | -0.23% |
| **ASIA** |  |  |  |  |  |  |
| BID | -5.48% | -3.00% | -1.79% | -1.48% | -2.40% | -0.61% |
| HPR | -2.76% | -0.60% | 0.12% | -0.89% | -0.58% | -0.25% |
| CRJ | -3.29% | -1.12% | -1.07% | -0.80% | -0.46% | -0.18% |
| **OCEANIA** |  |  |  |  |  |  |
| BID | -13.38% | -4.31% | -3.58% | -1.55% | -7.45% | -0.96% |
| HPR | 3.10% | -0.74% | 0.47% | -0.72% | -6.10% | -0.39% |
| CRJ | 2.26% | -0.64% | 0.18% | -0.53% | -4.77% | -0.27% |
| **EUROPE** |  |  |  |  |  |  |
| BID | 2.02% | -3.14% | -3.90% | -1.40% | 1.00% | -0.76% |
| HPR | -0.83% | -3.79% | -3.51% | -0.78% | -0.12% | -0.33% |
| CRJ | 0.88% | -2.18% | -2.24% | -0.56% | -0.12% | -0.23% |
| **WORLD** |  |  |  |  |  |  |
| BID | -1.84% | -1.84% | -1.48% | -1.48% | -0.66% | -0.66% |
| HPR | -1.04% | -1.04% | -0.84% | -0.84% | -0.28% | -0.28% |
| CRJ | -0.69% | -0.69% | -0.70% | -0.70% | -0.20% | -0.20% |

Table S4. Number and proportion of countries with positive changes in cumulative Net Output Values in 30x30 scenarios, 2025-2060.

| **Regions** | **Total countries** | **No. of countries with positive NOVs** | | | **% of countries with positive NOVs** | | |
| --- | --- | --- | --- | --- | --- | --- | --- |
| **BID** | **HPR** | **CRJ** | **BID** | **HPR** | **CRJ** |
| AFRICA | 50 | 38 | 46 | 44 | 76% | 92% | 88% |
| N/C AMERICA | 22 | 16 | 21 | 20 | 73% | 95% | 91% |
| S AMERICA | 13 | 11 | 11 | 11 | 85% | 85% | 85% |
| ASIA | 47 | 28 | 33 | 32 | 60% | 70% | 68% |
| OCEANIA | 11 | 7 | 11 | 9 | 64% | 100% | 82% |
| EUROPE | 37 | 30 | 35 | 34 | 81% | 95% | 92% |
| WORLD | 180 | 130 | 157 | 150 | 72% | 87% | 83% |

**Table S5**. Effects of a higher price elasticity on Net Output Values (billion 2018 US $, cumulative, 2025-2060) in world regions in 30x30 scenarios relative to reference scenario. Top rows: NOVs with mean cost; bottom rows: NOVs with 5% and 10% higher and lower costs than mean harvest costs.

|  | **Change relative to REF (Cumulative billion 2018 US $)** | | | **% Change relative to REF** | | |  | **Change relative to REF (Cumulative billion 2018 US $)** | | | **% Change relative to REF** | | |
| --- | --- | --- | --- | --- | --- | --- | --- | --- | --- | --- | --- | --- | --- |
| **Base cost** | **BID** | **HPR** | **CRJ** | **BID** | **HPR** | **CRJ** |  | **BID** | **HPR** | **CRJ** | **BID** | **HPR** | **CRJ** |
| AFRICA | 70.54 | 24.88 | 16.83 | 4.5% | 1.6% | 1.1% |  |  |  |  |  |  |  |
| N/C AMERICA | 231.91 | 90.45 | 100.14 | 9.3% | 3.6% | 4.0% |  |  |  |  |  |  |  |
| S AMERICA | 55.65 | 20.90 | 26.49 | 4.5% | 1.7% | 2.1% |  |  |  |  |  |  |  |
| ASIA | -52.23 | -81.71 | -137.44 | -1.1% | -1.7% | -2.8% |  |  |  |  |  |  |  |
| OCEANIA | -20.93 | 13.66 | 10.08 | -10.0% | 6.5% | 4.8% |  |  |  |  |  |  |  |
| EUROPE | 217.62 | 65.50 | 85.81 | 10.5% | 3.2% | 4.2% |  |  |  |  |  |  |  |
| WORLD | 502.56 | 133.67 | 101.92 | 4.0% | 1.1% | 0.8% |  |  |  |  |  |  |  |
|  | **Effects of higher harvest cost** | | | | | |  | **Effects of lower harvest cost** | | | | | |
| **5% higher cost** | **BID** | **HPR** | **CRJ** | **BID** | **HPR** | **CRJ** | **5% lower cost** | **BID** | **HPR** | **CRJ** | **BID** | **HPR** | **CRJ** |
| AFRICA | 45.53 | -0.81 | -8.85 | 2.9% | -0.1% | -0.6% | AFRICA | 95.55 | 50.56 | 42.52 | 6.2% | 3.3% | 2.7% |
| N/C AMERICA | 197.66 | 56.81 | 66.25 | 7.9% | 2.3% | 2.6% | N/C AMERICA | 266.17 | 124.10 | 134.03 | 10.6% | 5.0% | 5.4% |
| S AMERICA | 47.64 | 12.85 | 18.38 | 3.9% | 1.0% | 1.5% | S AMERICA | 63.66 | 28.95 | 34.61 | 5.2% | 2.3% | 2.8% |
| ASIA | -89.48 | -119.97 | -175.51 | -1.8% | -2.4% | -3.6% | ASIA | -14.98 | -43.44 | -99.37 | -0.3% | -0.9% | -2.0% |
| OCEANIA | -24.87 | 8.96 | 5.42 | -11.8% | 4.3% | 2.6% | OCEANIA | -16.99 | 18.35 | 14.75 | -8.1% | 8.7% | 7.0% |
| EUROPE | 141.12 | -8.95 | 10.03 | 6.8% | -0.4% | 0.5% | EUROPE | 294.11 | 139.95 | 161.59 | 14.2% | 6.8% | 7.8% |
| WORLD | 317.60 | -51.12 | -84.29 | 2.5% | -0.4% | -0.7% | WORLD | 687.52 | 318.47 | 288.13 | 5.5% | 2.6% | 2.3% |
| **10% higher cost** | **BID** | **HPR** | **CRJ** | **BID** | **HPR** | **CRJ** | **10% lower cost** | **BID** | **HPR** | **CRJ** | **BID** | **HPR** | **CRJ** |
| AFRICA | 20.52 | -26.50 | -34.54 | 1.3% | -1.7% | -2.2% | AFRICA | 120.56 | 76.25 | 68.21 | 7.8% | 4.9% | 4.4% |
| N/C AMERICA | 163.41 | 23.17 | 32.36 | 6.5% | 0.9% | 1.3% | N/C AMERICA | 300.42 | 157.74 | 167.92 | 12.0% | 6.3% | 6.7% |
| S AMERICA | 39.64 | 4.80 | 10.27 | 3.2% | 0.4% | 0.8% | S AMERICA | 71.66 | 37.00 | 42.72 | 5.8% | 3.0% | 3.5% |
| ASIA | -126.74 | -158.24 | -213.58 | -2.6% | -3.2% | -4.4% | ASIA | 22.28 | -5.17 | -61.30 | 0.5% | -0.1% | -1.2% |
| OCEANIA | -28.82 | 4.26 | 0.75 | -13.7% | 2.0% | 0.4% | OCEANIA | -13.05 | 23.05 | 19.41 | -6.2% | 11.0% | 9.2% |
| EUROPE | 64.63 | -83.41 | -65.75 | 3.1% | -4.0% | -3.2% | EUROPE | 370.61 | 214.40 | 237.37 | 17.9% | 10.4% | 11.5% |
| WORLD | 132.64 | -235.92 | -270.50 | 1.1% | -1.9% | -2.2% | WORLD | 872.48 | 503.27 | 474.34 | 7.0% | 4.0% | 3.8% |

**Table S6**. Estimated changes in Net Output Values (billion 2018 US $, cumulative, 2025-2060) in world regions in 30x30 scenarios relative to reference scenario. Top rows: NOVs with mean cost; bottom rows: NOVs with 5% and 10% higher and lower costs than mean harvest costs.

|  | **Change relative to REF (Cumulative billion 2018 US $)** | | | **% Change relative to REF** | | |  | **Change relative to REF (Cumulative billion 2018 US $)** | | | **% Change relative to REF** | | |
| --- | --- | --- | --- | --- | --- | --- | --- | --- | --- | --- | --- | --- | --- |
| **Base cost** | **BID** | **HPR** | **CRJ** | **BID** | **HPR** | **CRJ** |  | **BID** | **HPR** | **CRJ** | **BID** | **HPR** | **CRJ** |
| AFRICA | 98.55 | 41.23 | 31.37 | 6.4% | 2.7% | 2.0% |  |  |  |  |  |  |  |
| N/C AMERICA | 271.97 | 116.65 | 120.83 | 10.9% | 4.7% | 4.8% |  |  |  |  |  |  |  |
| S AMERICA | 66.68 | 26.91 | 32.36 | 5.4% | 2.2% | 2.6% |  |  |  |  |  |  |  |
| ASIA | 0.35 | -37.78 | -104.01 | 0.0% | -0.8% | -2.1% |  |  |  |  |  |  |  |
| OCEANIA | -17.47 | 16.59 | 12.29 | -8.3% | 7.9% | 5.8% |  |  |  |  |  |  |  |
| EUROPE | 250.83 | 86.23 | 99.60 | 12.1% | 4.2% | 4.8% |  |  |  |  |  |  |  |
| WORLD | 670.92 | 249.83 | 192.44 | 5.4% | 2.0% | 1.5% |  |  |  |  |  |  |  |
|  | **Effects of higher harvest cost** | | | | | |  | **Effects of lower harvest cost** | | | | | |
| **5% higher cost** | **BID** | **HPR** | **CRJ** | **BID** | **HPR** | **CRJ** | **5% lower cost** | **BID** | **HPR** | **CRJ** | **BID** | **HPR** | **CRJ** |
| AFRICA | 73.55 | 15.60 | 5.74 | 4.7% | 1.0% | 0.4% | AFRICA | 123.56 | 66.86 | 57.00 | 8.0% | 4.3% | 3.7% |
| N/C AMERICA | 237.86 | 83.17 | 87.11 | 9.5% | 3.3% | 3.5% | N/C AMERICA | 306.09 | 150.13 | 154.55 | 12.2% | 6.0% | 6.2% |
| S AMERICA | 58.73 | 18.91 | 24.29 | 4.8% | 1.5% | 2.0% | S AMERICA | 74.64 | 34.90 | 40.43 | 6.0% | 2.8% | 3.3% |
| ASIA | -36.77 | -75.97 | -141.98 | -0.7% | -1.5% | -2.9% | ASIA | 37.46 | 0.40 | -66.04 | 0.8% | 0.0% | -1.3% |
| OCEANIA | -21.40 | 11.92 | 7.65 | -10.2% | 5.7% | 3.6% | OCEANIA | -13.54 | 21.27 | 16.93 | -6.4% | 10.1% | 8.0% |
| EUROPE | 174.93 | 12.46 | 24.55 | 8.5% | 0.6% | 1.2% | EUROPE | 326.72 | 160.00 | 174.64 | 15.8% | 7.7% | 8.5% |
| WORLD | 486.90 | 66.10 | 7.36 | 3.9% | 0.5% | 0.1% | WORLD | 854.93 | 433.56 | 377.51 | 6.9% | 3.5% | 3.0% |
| **10% higher cost** | **BID** | **HPR** | **CRJ** | **BID** | **HPR** | **CRJ** | **10% lower cost** | **BID** | **HPR** | **CRJ** | **BID** | **HPR** | **CRJ** |
| AFRICA | 48.54 | -10.03 | -19.89 | 3.1% | -0.6% | -1.3% | AFRICA | 148.56 | 92.49 | 82.63 | 9.6% | 6.0% | 5.3% |
| N/C AMERICA | 203.74 | 49.69 | 53.40 | 8.1% | 2.0% | 2.1% | N/C AMERICA | 340.20 | 183.61 | 188.26 | 13.6% | 7.3% | 7.5% |
| S AMERICA | 50.78 | 10.92 | 16.22 | 4.1% | 0.9% | 1.3% | S AMERICA | 82.59 | 42.89 | 48.49 | 6.7% | 3.5% | 3.9% |
| ASIA | -73.88 | -114.15 | -179.95 | -1.5% | -2.3% | -3.7% | ASIA | 74.58 | 38.58 | -28.07 | 1.5% | 0.8% | -0.6% |
| OCEANIA | -25.33 | 7.24 | 3.01 | -12.0% | 3.4% | 1.4% | OCEANIA | -9.61 | 25.94 | 21.57 | -4.6% | 12.3% | 10.3% |
| EUROPE | 99.04 | -61.31 | -50.49 | 4.8% | -3.0% | -2.4% | EUROPE | 402.61 | 233.78 | 249.69 | 19.5% | 11.3% | 12.1% |
| WORLD | 302.89 | -117.63 | -177.71 | 2.4% | -0.9% | -1.4% | WORLD | 1,038.94 | 617.29 | 562.58 | 8.3% | 5.0% | 4.5% |

**Table S7**. Effects of a lower price elasticity of supply and higher and lower harvest costs on estimated Net Output Values (NOV) in major world regions in 30x30 scenarios relative to reference scenario. Top rows: NOVs with mean cost; bottom rows: NOVs with 5% and 10% higher and lower costs.

|  | **Change relative to REF (Cumulative billion 2018 US $)** | | | **% Change relative to REF** | | |  | **Change relative to REF (Cumulative billion 2018 US $)** | | | **% Change relative to REF** | | |
| --- | --- | --- | --- | --- | --- | --- | --- | --- | --- | --- | --- | --- | --- |
| **Base cost** | **BID** | **HPR** | **CRJ** | **BID** | **HPR** | **CRJ** |  | **BID** | **HPR** | **CRJ** | **BID** | **HPR** | **CRJ** |
| AFRICA | 135.51 | 61.83 | 51.58 | 8.7% | 4.0% | 3.3% |  |  |  |  |  |  |  |
| N/C AMERICA | 323.97 | 153.82 | 155.50 | 13.0% | 6.2% | 6.2% |  |  |  |  |  |  |  |
| S AMERICA | 83.31 | 37.21 | 41.19 | 6.7% | 3.0% | 3.3% |  |  |  |  |  |  |  |
| ASIA | 73.88 | 17.86 | -53.77 | 1.5% | 0.4% | -1.1% |  |  |  |  |  |  |  |
| OCEANIA | -13.39 | 20.57 | 15.91 | -6.4% | 9.8% | 7.6% |  |  |  |  |  |  |  |
| EUROPE | 298.52 | 118.80 | 128.05 | 14.5% | 5.8% | 6.2% |  |  |  |  |  |  |  |
| WORLD | 901.80 | 410.09 | 338.46 | 7.2% | 3.3% | 2.7% |  |  |  |  |  |  |  |
|  | **Effects of higher harvest cost** | | | | | |  | **Effects of lower harvest cost** | | | | | |
| **5% higher cost** | **BID** | **HPR** | **CRJ** | **BID** | **HPR** | **CRJ** | **5% higher cost** | **BID** | **HPR** | **CRJ** | **BID** | **HPR** | **CRJ** |
| AFRICA | 110.58 | 36.28 | 26.02 | 7.1% | 2.3% | 1.7% | AFRICA | 160.44 | 87.39 | 77.14 | 10.3% | 5.6% | 5.0% |
| N/C AMERICA | 290.03 | 120.50 | 121.94 | 11.6% | 4.8% | 4.9% | N/C AMERICA | 357.92 | 187.13 | 189.05 | 14.3% | 7.5% | 7.6% |
| S AMERICA | 75.41 | 29.27 | 33.18 | 6.1% | 2.4% | 2.7% | S AMERICA | 91.21 | 45.15 | 49.20 | 7.4% | 3.7% | 4.0% |
| ASIA | 36.93 | -20.21 | -91.63 | 0.8% | -0.4% | -1.9% | ASIA | 110.84 | 55.94 | -15.91 | 2.3% | 1.1% | -0.3% |
| OCEANIA | -17.30 | 15.92 | 11.30 | -8.2% | 7.6% | 5.4% | OCEANIA | -9.48 | 25.22 | 20.53 | -4.5% | 12.0% | 9.8% |
| EUROPE | 223.32 | 45.69 | 53.73 | 10.8% | 2.2% | 2.6% | EUROPE | 373.71 | 191.92 | 202.38 | 18.1% | 9.3% | 9.8% |
| WORLD | 718.97 | 227.44 | 154.54 | 5.8% | 1.8% | 1.2% | WORLD | 1,084.63 | 592.75 | 522.38 | 8.7% | 4.8% | 4.2% |
| **10% higher cost** | **BID** | **HPR** | **CRJ** | **BID** | **HPR** | **CRJ** | **10% higher cost** | **BID** | **HPR** | **CRJ** | **BID** | **HPR** | **CRJ** |
| AFRICA | 85.65 | 10.73 | 0.46 | 5.5% | 0.7% | 0.0% | AFRICA | 185.37 | 112.94 | 102.71 | 11.9% | 7.3% | 6.6% |
| N/C AMERICA | 256.08 | 87.19 | 88.39 | 10.2% | 3.5% | 3.5% | N/C AMERICA | 391.87 | 220.45 | 222.60 | 15.7% | 8.8% | 8.9% |
| S AMERICA | 67.52 | 21.33 | 25.17 | 5.5% | 1.7% | 2.0% | S AMERICA | 99.10 | 53.09 | 57.21 | 8.0% | 4.3% | 4.6% |
| ASIA | -0.03 | -58.29 | -129.49 | 0.0% | -1.2% | -2.6% | ASIA | 147.79 | 94.02 | 21.95 | 3.0% | 1.9% | 0.4% |
| OCEANIA | -21.21 | 11.26 | 6.68 | -10.1% | 5.4% | 3.2% | OCEANIA | -5.58 | 29.87 | 25.14 | -2.7% | 14.2% | 12.0% |
| EUROPE | 148.13 | -27.43 | -20.60 | 7.2% | -1.3% | -1.0% | EUROPE | 448.91 | 265.04 | 276.70 | 21.7% | 12.8% | 13.4% |
| WORLD | 536.14 | 44.79 | -29.39 | 4.3% | 0.4% | -0.2% | WORLD | 1,267.46 | 775.40 | 706.30 | 10.2% | 6.2% | 5.7% |

Table S8. Estimated mean harvest costs * and assumed increases in those costs under two sensitivity tests.

| **Region** | **Harvest cost** **†**  **($/m3)** | **Transport cost**  **($/m3)** | **Total harvest cost**  **($/m3)** | **Assumed increases in transport costs for sensitivity test** | | | |
| --- | --- | --- | --- | --- | --- | --- | --- |
| **25%** | | **12.5%** | |
| **Total harvest cost**  **($/m3)** | **Implied variation (%)** | **Total harvest cost**  **($/m3)** | **Implied variation (%)** |
| Latin America and Caribbean ‡ | 6.98 | 3.90 | 10.88 | 11.85 | 9.0 | 11.36 | 4.5 |
| Uruguay | 12.90 | 7.20 | 20.10 | 21.90 | 9.0 | 21.00 | 4.5 |
| Asia § | 9.19 | 5.13 | 14.32 | 15.60 | 9.0 | 14.96 | 4.5 |
| North America | 15.17 | 8.47 | 23.63 | 25.75 | 9.0 | 24.69 | 4.5 |
| Australia | 21.45 | 11.97 | 33.42 | 36.41 | 9.0 | 34.91 | 4.5 |
| Western Europe | 30.14 | 16.82 | 46.96 | 51.16 | 9.0 | 49.06 | 4.5 |
| Eastern Europe | 30.54 | 17.04 | 47.58 | 51.84 | 9.0 | 49.71 | 4.5 |
| Europe Average | 30.34 | 16.93 | 47.27 | 51.50 | 9.0 | 49.39 | 4.5 |
| Africa | 11.43 | 6.38 | 17.80 | 19.40 | 9.0 | 18.60 | 4.5 |

*All costs are adjusted to 2018-constant-dollar values.

† Includes pre-harvesting and harvesting costs.

‡ Excludes Uruguay.

§ Especially SE Asia; excludes outlier countries with very high costs.

Table S9. Percent of total forest area that is available for harvest in 2030 (relative to 2020) in the reference and the 30x30 scenario by major world regions and in selected countries.

| **Region/Country** | **REF** | **BID** | **HPR** | **CRJ** |
| --- | --- | --- | --- | --- |
| **AFRICA** | **86%** | **66%** | **69%** | **78%** |
| Algeria | 93% | 9% | 77% | 83% |
| Angola | 97% | 80% | 54% | 94% |
| Benin | 87% | 86% | 85% | 85% |
| Botswana | 64% | 46% | 27% | 50% |
| Burkina Faso | 52% | 52% | 52% | 52% |
| Burundi | 58% | 44% | 54% | 54% |
| Cameroon | 88% | 42% | 71% | 58% |
| Cape Verde | 50% | 37% | 50% | 50% |
| Central African Republic | 82% | 81% | 55% | 77% |
| Chad | 93% | 83% | 51% | 77% |
| Congo, Republic of | 64% | 41% | 64% | 55% |
| Côte d'Ivoire | 70% | 62% | 70% | 70% |
| Djibouti | 100% | 100% | 100% | 100% |
| Egypt | 100% | 100% | 100% | 100% |
| Equatorial Guinea | 78% | 1% | 78% | 78% |
| Ethiopia | 94% | 72% | 86% | 89% |
| Gabon | 77% | 35% | 75% | 68% |
| Gambia | 98% | 64% | 76% | 76% |
| Ghana | 80% | 75% | 80% | 80% |
| Guinea | 59% | 57% | 59% | 59% |
| Guinea-Bissau | 89% | 54% | 85% | 85% |
| Kenya | 77% | 38% | 71% | 71% |
| Lesotho | 98% | 44% | 34% | 25% |
| Liberia | 93% | 7% | 74% | 42% |
| Libyan Arab Jamahiriya | 86% | 5% | 72% | 86% |
| Madagascar | 90% | 41% | 85% | 75% |
| Malawi | 90% | 14% | 62% | 60% |
| Mali | 84% | 79% | 67% | 79% |
| Mauritania | 100% | 100% | 100% | 100% |
| Mauritius | 97% | 6% | 95% | 95% |
| Morocco | 71% | 7% | 60% | 60% |
| Mozambique | 93% | 64% | 62% | 72% |
| Niger | 90% | 88% | 35% | 80% |
| Nigeria | 97% | 63% | 75% | 75% |
| Réunion | 13% | 6% | 13% | 13% |
| Rwanda | 98% | 5% | 47% | 47% |
| Sao Tome and Principe | 100% | 20% | 99% | 99% |
| Senegal | 100% | 43% | 73% | 74% |
| Sierra Leone | 90% | 75% | 89% | 89% |
| Somalia | 100% | 35% | 41% | 93% |
| South Africa | 82% | 10% | 74% | 72% |
| Sudan | 99% | 90% | 78% | 89% |
| Swaziland | 92% | 29% | 88% | 88% |
| Tanzania, United Rep of | 56% | 39% | 54% | 54% |
| Togo | 97% | 57% | 82% | 82% |
| Tunisia | 86% | 30% | 73% | 74% |
| Uganda | 80% | 63% | 80% | 80% |
| Congo, Dem Republic of | 92% | 79% | 75% | 88% |
| Zambia | 79% | 70% | 79% | 79% |
| Zimbabwe | 82% | 66% | 79% | 79% |
| **N/C AMERICA** | **92%** | **87%** | **85%** | **91%** |
| Bahamas | 81% | 19% | 81% | 81% |
| Barbados | 86% | 10% | 86% | 86% |
| Belize | 67% | 35% | 67% | 67% |
| Canada | 89% | 89% | 77% | 89% |
| Saint Lucia | 94% | 85% | 94% | 94% |
| Costa Rica | 76% | 45% | 76% | 76% |
| Cuba | 76% | 30% | 76% | 76% |
| Dominica | 78% | 44% | 78% | 78% |
| Dominican Republic | 68% | 35% | 68% | 68% |
| El Salvador | 100% | 13% | 88% | 88% |
| Guatemala | 91% | 69% | 91% | 91% |
| Haiti | 88% | 38% | 76% | 70% |
| Honduras | 74% | 42% | 74% | 74% |
| Jamaica | 98% | 94% | 98% | 98% |
| Martinique | 3% | 3% | 3% | 3% |
| Mexico | 96% | 81% | 93% | 93% |
| Netherlands Antilles | 53% | 23% | 53% | 53% |
| Nicaragua | 97% | 25% | 60% | 60% |
| Panama | 95% | 17% | 72% | 69% |
| Saint Vincent/Grenadines | 69% | 29% | 69% | 69% |
| Trinidad and Tobago | 50% | 12% | 50% | 50% |
| United States of America | 97% | 93% | 97% | 97% |
| **S AMERICA** | **72%** | **61%** | **66%** | **69%** |
| Argentina | 96% | 81% | 88% | 92% |
| Bolivia | 60% | 42% | 50% | 60% |
| Brazil | 61% | 54% | 55% | 59% |
| Chile | 70% | 27% | 70% | 70% |
| Colombia | 97% | 91% | 94% | 93% |
| Ecuador | 74% | 8% | 62% | 60% |
| French Guiana | 49% | 18% | 49% | 49% |
| Guyana | 100% | 100% | 100% | 100% |
| Paraguay | 81% | 69% | 64% | 73% |
| Peru | 96% | 89% | 94% | 93% |
| Suriname | 100% | 40% | 76% | 61% |
| Uruguay | 95% | 82% | 84% | 88% |
| Venezuela, Boliv Rep of | 68% | 63% | 68% | 68% |
| **ASIA** | **90%** | **58%** | **75%** | **75%** |
| Afghanistan | 100% | 4% | 29% | 20% |
| Bahrain | 100% | 100% | 100% | 100% |
| Bangladesh | 95% | 77% | 86% | 88% |
| Bhutan | 75% | 55% | 75% | 75% |
| Brunei Darussalam | 55% | 20% | 55% | 55% |
| Cambodia | 65% | 39% | 60% | 64% |
| China | 99% | 83% | 81% | 82% |
| Cyprus | 22% | 14% | 22% | 22% |
| Maldives | 100% | 100% | 100% | 100% |
| India | 87% | 32% | 70% | 77% |
| Indonesia | 88% | 49% | 80% | 73% |
| Iran, Islamic Rep of | 91% | 56% | 85% | 85% |
| Iraq | 36% | 14% | 12% | 10% |
| Israel | 46% | 10% | 46% | 46% |
| Japan | 68% | 46% | 68% | 68% |
| Jordan | 100% | 0% | 49% | 49% |
| Korea, Dem People's Rep | 97% | 95% | 29% | 97% |
| Korea, Republic of | 65% | 38% | 65% | 65% |
| Kuwait | 100% | 100% | 100% | 100% |
| Laos | 100% | 100% | 100% | 100% |
| Lebanon | 97% | 11% | 63% | 63% |
| Timor-Leste | 100% | 100% | 100% | 100% |
| Malaysia | 77% | 15% | 70% | 66% |
| Mongolia | 69% | 68% | 63% | 68% |
| Myanmar | 87% | 26% | 71% | 50% |
| Nepal | 95% | 67% | 87% | 87% |
| Oman | 100% | 13% | 44% | 33% |
| Pakistan | 99% | 26% | 72% | 67% |
| Philippines | 100% | 86% | 97% | 97% |
| Qatar | 100% | 100% | 19% | 93% |
| Saudi Arabia | 100% | 81% | 78% | 91% |
| Singapore | 100% | -8% | 100% | 100% |
| Sri Lanka | 50% | 8% | 50% | 50% |
| Syrian Arab Republic | 100% | 14% | 61% | 18% |
| Thailand | 87% | 9% | 47% | 48% |
| Turkey | 100% | 61% | 34% | 23% |
| United Arab Emirates | 90% | 86% | 20% | 20% |
| Viet Nam | 84% | 40% | 82% | 81% |
| Yemen | 100% | 46% | 31% | 100% |
| Armenia | 74% | 20% | 68% | 68% |
| Azerbaijan, Republic of | 67% | 18% | 56% | 56% |
| Georgia | 88% | 17% | 84% | 84% |
| Kazakhstan | 85% | 85% | 51% | 83% |
| Kyrgyzstan | 92% | 81% | 63% | 65% |
| Tajikistan | 100% | 68% | 56% | 55% |
| Turkmenistan | 97% | 46% | 23% | 56% |
| Uzbekistan | 45% | 45% | 32% | 44% |
| **OCEANIA** | **77%** | **53%** | **77%** | **77%** |
| Australia | 68% | 30% | 68% | 68% |
| Cook Islands | 95% | 88% | 95% | 95% |
| Fiji Islands | 95% | 54% | 92% | 92% |
| French Polynesia | 98% | 25% | 81% | 82% |
| New Caledonia | 60% | 23% | 60% | 60% |
| New Zealand | 27% | 13% | 27% | 27% |
| Papua New Guinea | 100% | 100% | 100% | 100% |
| Samoa | 95% | 26% | 95% | 95% |
| Solomon Islands | 100% | 72% | 89% | 89% |
| Tonga | 85% | 66% | 85% | 85% |
| Vanuatu | 99% | 86% | 97% | 97% |
| **EUROPE** | **88%** | **85%** | **72%** | **85%** |
| Albania | 78% | 25% | 71% | 71% |
| Austria | 71% | 49% | 66% | 66% |
| Belgium | 24% | 24% | 24% | 24% |
| Bosnia and Herzegovina | 98% | 66% | 62% | 56% |
| Bulgaria | 72% | 64% | 72% | 72% |
| Croatia | 45% | 38% | 45% | 45% |
| Czechia | 51% | 51% | 51% | 51% |
| Denmark | 31% | 31% | 31% | 31% |
| Finland | 86% | 86% | 86% | 86% |
| France | 49% | 42% | 47% | 47% |
| Germany | 64% | 64% | 64% | 64% |
| Greece | 48% | 19% | 48% | 48% |
| Hungary | 52% | 52% | 52% | 52% |
| Luxembourg | 24% | 24% | 24% | 24% |
| Ireland | 51% | 46% | 46% | 46% |
| Italy | 66% | 28% | 66% | 66% |
| Montenegro | 92% | 19% | 92% | 92% |
| Netherlands | 3% | 3% | 3% | 3% |
| North Macedonia | 87% | 17% | 72% | 72% |
| Norway | 89% | 86% | 78% | 78% |
| Poland | 36% | 36% | 36% | 36% |
| Portugal | 84% | 50% | 79% | 79% |
| Romania | 56% | 56% | 56% | 56% |
| Slovakia | 36% | 36% | 36% | 36% |
| Slovenia | 31% | 21% | 31% | 31% |
| Spain | 66% | 45% | 66% | 66% |
| Sweden | 81% | 81% | 81% | 81% |
| Switzerland | 68% | 53% | 65% | 65% |
| United Kingdom | 57% | 53% | 53% | 53% |
| Serbia | 86% | 64% | 82% | 82% |
| Belarus | 83% | 82% | 82% | 83% |
| Estonia | 82% | 82% | 82% | 82% |
| Latvia | 75% | 74% | 75% | 75% |
| Lithuania | 64% | 64% | 64% | 64% |
| Moldova, Republic of | 93% | 93% | 84% | 87% |
| Russian Federation | 91% | 90% | 72% | 88% |
| Ukraine | 84% | 83% | 83% | 84% |
| **WORLD** | **85%** | **73%** | **73%** | **80%** |
