# Supplementary material for: Reports of the economic cost of global forest protection have been greatly exaggerated
Source: Research Square preprint supplement (doi:10.21203/rs.3.rs-7926525/v1), 2025-10-30
Supplement: Supplementary file 4 [file f3f512147a573af65aa1fd6d.docx]

Table S6. Estimated changes in Net Output Values (billion 2018 US $, cumulative, 2025-2060) in world regions in 30x30 scenarios relative to reference scenario. Top rows: NOVs with mean cost; bottom rows: NOVs with 5% and 10% higher and lower costs than mean harvest costs.

|  | **Change relative to REF (Cumulative billion 2018 US $)** | | | **% Change relative to REF** | | |  | **Change relative to REF (Cumulative billion 2018 US $)** | | | **% Change relative to REF** | | |
| --- | --- | --- | --- | --- | --- | --- | --- | --- | --- | --- | --- | --- | --- |
| **Base cost** | **BID** | **HPR** | **CRJ** | **BID** | **HPR** | **CRJ** |  | **BID** | **HPR** | **CRJ** | **BID** | **HPR** | **CRJ** |
| AFRICA | 98.55 | 41.23 | 31.37 | 6.4% | 2.7% | 2.0% |  |  |  |  |  |  |  |
| N/C AMERICA | 271.97 | 116.65 | 120.83 | 10.9% | 4.7% | 4.8% |  |  |  |  |  |  |  |
| S AMERICA | 66.68 | 26.91 | 32.36 | 5.4% | 2.2% | 2.6% |  |  |  |  |  |  |  |
| ASIA | 0.35 | -37.78 | -104.01 | 0.0% | -0.8% | -2.1% |  |  |  |  |  |  |  |
| OCEANIA | -17.47 | 16.59 | 12.29 | -8.3% | 7.9% | 5.8% |  |  |  |  |  |  |  |
| EUROPE | 250.83 | 86.23 | 99.60 | 12.1% | 4.2% | 4.8% |  |  |  |  |  |  |  |
| WORLD | 670.92 | 249.83 | 192.44 | 5.4% | 2.0% | 1.5% |  |  |  |  |  |  |  |
|  | **Effects of higher harvest cost** | | | | | |  | **Effects of lower harvest cost** | | | | | |
| **5% higher cost** | **BID** | **HPR** | **CRJ** | **BID** | **HPR** | **CRJ** | **5% lower cost** | **BID** | **HPR** | **CRJ** | **BID** | **HPR** | **CRJ** |
| AFRICA | 73.55 | 15.60 | 5.74 | 4.7% | 1.0% | 0.4% | AFRICA | 123.56 | 66.86 | 57.00 | 8.0% | 4.3% | 3.7% |
| N/C AMERICA | 237.86 | 83.17 | 87.11 | 9.5% | 3.3% | 3.5% | N/C AMERICA | 306.09 | 150.13 | 154.55 | 12.2% | 6.0% | 6.2% |
| S AMERICA | 58.73 | 18.91 | 24.29 | 4.8% | 1.5% | 2.0% | S AMERICA | 74.64 | 34.90 | 40.43 | 6.0% | 2.8% | 3.3% |
| ASIA | -36.77 | -75.97 | -141.98 | -0.7% | -1.5% | -2.9% | ASIA | 37.46 | 0.40 | -66.04 | 0.8% | 0.0% | -1.3% |
| OCEANIA | -21.40 | 11.92 | 7.65 | -10.2% | 5.7% | 3.6% | OCEANIA | -13.54 | 21.27 | 16.93 | -6.4% | 10.1% | 8.0% |
| EUROPE | 174.93 | 12.46 | 24.55 | 8.5% | 0.6% | 1.2% | EUROPE | 326.72 | 160.00 | 174.64 | 15.8% | 7.7% | 8.5% |
| WORLD | 486.90 | 66.10 | 7.36 | 3.9% | 0.5% | 0.1% | WORLD | 854.93 | 433.56 | 377.51 | 6.9% | 3.5% | 3.0% |
| **10% higher cost** | **BID** | **HPR** | **CRJ** | **BID** | **HPR** | **CRJ** | **10% lower cost** | **BID** | **HPR** | **CRJ** | **BID** | **HPR** | **CRJ** |
| AFRICA | 48.54 | -10.03 | -19.89 | 3.1% | -0.6% | -1.3% | AFRICA | 148.56 | 92.49 | 82.63 | 9.6% | 6.0% | 5.3% |
| N/C AMERICA | 203.74 | 49.69 | 53.40 | 8.1% | 2.0% | 2.1% | N/C AMERICA | 340.20 | 183.61 | 188.26 | 13.6% | 7.3% | 7.5% |
| S AMERICA | 50.78 | 10.92 | 16.22 | 4.1% | 0.9% | 1.3% | S AMERICA | 82.59 | 42.89 | 48.49 | 6.7% | 3.5% | 3.9% |
| ASIA | -73.88 | -114.15 | -179.95 | -1.5% | -2.3% | -3.7% | ASIA | 74.58 | 38.58 | -28.07 | 1.5% | 0.8% | -0.6% |
| OCEANIA | -25.33 | 7.24 | 3.01 | -12.0% | 3.4% | 1.4% | OCEANIA | -9.61 | 25.94 | 21.57 | -4.6% | 12.3% | 10.3% |
| EUROPE | 99.04 | -61.31 | -50.49 | 4.8% | -3.0% | -2.4% | EUROPE | 402.61 | 233.78 | 249.69 | 19.5% | 11.3% | 12.1% |
| WORLD | 302.89 | -117.63 | -177.71 | 2.4% | -0.9% | -1.4% | WORLD | 1,038.94 | 617.29 | 562.58 | 8.3% | 5.0% | 4.5% |
